# Supplementary material
Source: Elsevier journal article supplement (https://www.sciencedirect.com/science/article/pii/S0034935621003054)
Supplement: mmc1 [file S0034935621003054:mmc1.doc]

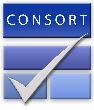
Lista de verificación de CONSORT 2010 de la información a incluir al reportar un estudio piloto o de viabilidad*

| Sección/Materia | Nº ítem | Ítem de la lista de verificación | Reportado en la página número |
| --- | --- | --- | --- |
| Título y resumen | | | |
|  | 1a | Identificación en el título como estudio piloto o estudio aleatorizado de viabilidad | 1 |
| 1b | Resumen estructurado del diseño de estudio piloto, métodos, resultados y conclusiones (para orientación específica véase la ampliación del resumen de CONSORT para estudios piloto) | 1 |
| Introducción | | | |
| Antecedentes y objetivos | 2a | Antecedentes científicos y explicación del fundamento para el estudio definitivo futuro, y motivos del estudio piloto aleatorizado | 2 |
| 2b | Objetivos específicos o cuestiones de investigación del estudio piloto | 3 |
| Métodos | | | |
| Diseño del ensayo | 3a | Descripción del diseño del estudio piloto (paralelo, factorial) incluyendo el ratio de asignación | 3 |
| 3b | Cambios importantes de los métodos tras el inicio del estudio piloto (como criterios de elegibilidad), y motivos | 3 |
| Participantes | 4a | Criterios de elegibilidad para los participantes | 3 |
| 4b | Entornos y localizaciones donde se recopilaron los datos | 3 |
|  | 4c | Modo de identificación y consentimiento de los participantes | 3 |
| Intervenciones | 5 | Intervenciones para cada grupo con datos suficientes que permitan la replicación, incluyendo cómo y cuándo fueron realmente administradas | 3 |
| Resultados | 6a | Evaluaciones o medidas pre-especificadas completamente definidas para abordar cada objetivo del estudio piloto especificado en 2b, incluyendo cómo y cuándo fueron evaluadas | 6 |
| 6b | Cambios realizados a las evaluaciones o medidas del estudio piloto tras su inicio, y motivos | NA |
|  | 6c | Si procede, criterios pre-especificados para juzgar la posibilidad o el modo de proceder con el estudio definitivo futuro | NA |
| Tamaño de la muestra | 7a | Fundamento de las cifras del estudio piloto | 3 |
| 7b | Si procede, explicación de cualquier análisis interino y orientaciones de la interrupción | NA |
| Aleatorización: |  |  |  |
| Generación de secuencia | 8a | Método utilizado para generar la secuencia de asignación aleatoria | NA |
| 8b | Tipo de aleatorización(es); detalles de cualquier restricción (tales como bloqueo y tamaño del bloqueo) | NA |
| Mecanismo de ocultación de la asignación | 9 | Mecanismo utilizado para implementar la secuencia de asignación de aleatoriedad (como contenedores secuencialmente numerados), describiendo cualquier medida adoptada para ocultar la secuencia hasta la asignación de las intervenciones | NA |
| Implementación | 10 | Quién generó la secuencia de asignación aleatoria, quién seleccionó a los participantes, y quién asignó las intervenciones a los participantes | NA |
| Estudio ciego | 11a | De realizarse, quién fue ocultado tras asignar las intervenciones (por ejemplo, participantes, profesionales sanitarios, evaluadores de los resultados) y cómo | NA |
| 11b | De ser relevante, descripción de la similitud de las intervenciones | NA |
| Métodos estadísticos | 12 | Métodos utilizados para abordar cada objetivo del estudio piloto, tanto cualitativo como cuantitativo | 7 |
| Resultados | | | |
| Flujo de participantes (diagrama altamente recomendable) | 13a | Para cada grupo, número de participantes a los que se accedió y/o evaluó para elegibilidad, se asignó aleatoriamente, recibieron el tratamiento previsto, y fueron evaluados para cada objetivo | 7 |
| 13b | Para cada grupo, pérdidas y exclusiones tras la aleatorización, junto con los motivos | NA |
| Selección | 14a | Fechas que definen los periodos de selección y seguimiento | 3 |
| 14b | Motivo de finalización o interrupción del estudio piloto | NA |
| Datos basales | 15 | Tabla que refleje los datos demográficos y características clínicas basales de cada grupo | NA |
| Cifras analizadas | 16 | Para cada objetivo, número de participantes (denominador) incluidos en cada análisis. Si es relevante, dichas cifras deberán referirse a cada grupo aleatorizado | 7 |
| Resultados y estimación | 17 | Para cada objetivo, resultados que incluyan expresiones de incertidumbre (como el 95% de intervalo de confianza) para cada estimación. Si es relevante, dichos resultados deberán referirse a cada grupo aleatorizado | 8 |
| Análisis complementarios | 18 | Resultados de otros análisis realizados que pudieran utilizarse para informar al estudio definitivo futuro | NA |
| Daños | 19 | Todos los daños importantes o efectos no intencionados de cada grupo (para orientación específica véanse los daños en CONSORT) | NA |
|  | 19a | Si es relevante, otras consecuencias importantes no intencionadas | 9 |
| Discusión | | | |
| Limitaciones | 20 | Limitaciones del estudio piloto, abordando fuentes potenciales de sesgo y demás incertidumbre acerca de la viabilidad | 11 |
| Generalizabilidad | 21 | Generalizabilidad (aplicabilidad) de los métodos y hallazgos del estudio piloto para el estudio definitivo futuro y demás estudios | 10 |
| Interpretación | 22 | Interpretación consistente con los objetivos y hallazgos del estudio piloto, equilibrando los beneficios y daños potenciales, y considerando otra evidencia relevante | 10 |
|  | 22a | Implicaciones para la progresión desde estudio piloto a estudio definitivo futuro, incluyendo cualquier modificación propuesta | 11 |
| Otra información | | |  |
| Registro | 23 | Número de registro del estudio piloto y nombre del mismo | NA |
| Protocolo | 24 | Lugar puede accederse al protocolo del estudio piloto, de estar disponible | NA |
| Financiación | 25 | Fuentes de financiación y demás respaldo (tal como suministro de fármacos), rol de los financiadores | NA |
|  | 26 | Aprobación ética o aprobación del comité de revisión de investigación, confirmada con número de referencia | PR (AG) 448/2020 |

Cita: Eldridge SM, Chan CL, Campbell MJ, Bond CM, Hopewell S, Thabane L, et al. Declaración CONSORT 2010: ampliación de estudios piloto aleatorizados y estudios de viabilidad. BMJ. 2016;355.

*Recomendamos vivamente la lectura de esta declaración junto con la ampliación de estudios piloto aleatorizados y estudios de viabilidad, explicación y elaboración de CONSORT 2010, para aclaración importante de todos los ítems. Si es relevante, también recomendamos la lectura de todas las ampliaciones de para estudios aleatorizados de clústers, estudios de no inferioridad y estudios de equivalencia, tratamientos no farmacológicos, intervenciones herbales, y estudios pragmáticos. Próximas ampliaciones adicionales: para referencias y referencias actuales relevantes para esta lista de verificación, consúltese [www.consort-statement.org](http://www.consort-statement.org).

**ENCUESTA DE SATISFACCIÓN – SIMULACIÓN CLÍNICA DE COMPETENCIAS NO TÉCNICAS**

Anestesiología, Cuidados y críticos y Gestión del dolor – Hospital Universitario Vall d´ Hebrón

Estimado residente:

Gracias por participar en la simulación clínica de competencias no técnicas. En la encuesta siguiente deberán marcar de 0 a 5 cada ítem, de acuerdo con su opinión.

|  | 0 | 1 | 2 | 3 | 4 | 5 |
| --- | --- | --- | --- | --- | --- | --- |
| **ACTIVIDADES FORMATIVAS PREVIAS A LA SIMULACIÓN CLÍNICA** |  |  |  |  |  |  |
| 1. El desarrollo del material teórico me permitió adquirir nuevos conocimientos. |  |  |  |  |  |  |
| 1. El modelo VHISCA me fue útil para construir casos simulados. |  |  |  |  |  |  |
| 1. Me ha resultado útil crear un caso clínico simulado como parte de mi aprendizaje. |  |  |  |  |  |  |
| 1. Me he sentido satisfecho al ser parte de la creación de este proyecto de simulación (preparación de material bibliográfico, preparación de la sala de simulación y participación en los casos simulados). |  |  |  |  |  |  |
| 1. Considero que las diferentes actividades llevadas a cabo para elaborar la experiencia basada en simulación han supuesto una carga de trabajo para mí. |  |  |  |  |  |  |
| **SIMULACIÓN CLÍNICA** |  |  |  |  |  |  |
| 1. Considero que los casos de simulación son casi reales y me han permitido vivir una experiencia plena. |  |  |  |  |  |  |
| 1. El tiempo empleado en la simulación fue adecuado. |  |  |  |  |  |  |
| **REUNIÓN INFORMATIVA** |  |  |  |  |  |  |
| 1. La reunión informativa fue útil para mi aprendizaje. |  |  |  |  |  |  |
| 1. Mi propia evaluación y la de mis compañeros resultaron útiles para el proceso de aprendizaje. |  |  |  |  |  |  |
| 1. El tiempo empleado en la sesión informativa fue adecuado. |  |  |  |  |  |  |
| 1. El moderador preparó un entorno de expresión libre que permitió el diálogo y el aprendizaje. |  |  |  |  |  |  |
| **APRENDIZAJE** |  |  |  |  |  |  |
| 1. Creo que he podido adquirir nuevas competencias no técnicas con la experiencia basada en simulación (“conocimiento de la situación, toma de decisiones, equipo de trabajo, liderazgo, y gestión de estrés y fatiga). |  |  |  |  |  |  |
| 1. Siento que he podido adquirir nuevas competencias técnicas con la experiencia basada en simulación. |  |  |  |  |  |  |
| 1. Considero que lo que he aprendido es útil para la vida real. Esta simulación ha impactado en mi práctica diaria. |  |  |  |  |  |  |
| 1. Me siento más seguro de mis capacidades a la hora de enfrentarme a una situación de crisis en la práctica clínica. |  |  |  |  |  |  |
| **SATISFACCIÓN** |  |  |  |  |  |  |
| 1. Repetiría de nuevo la experiencia basada en simulación. |  |  |  |  |  |  |
| 1. Recomendaría la experiencia basada en simulación a otros residentes como parte del aprendizaje integral de la formación. |  |  |  |  |  |  |

¿Qué obstáculos encuentro yo en materia de aprendizaje durante la experiencia basada en simulación?

______________________________________________________________________________________________________________________________________________________________________________________________________________________________________________________________________

¿Qué aspectos mejoraría Vd. de este desempeño?

______________________________________________________________________________________________________________________________________________________________________________________________________________________________________________________________________

¿Qué aspectos positivos encuentro yo en la preparación y desempeño de la experiencia basada en simulación?

______________________________________________________________________________________________________________________________________________________________________________________________________________________________________________________________________

Explique en una frase su aprendizaje o reflexiones del día de hoy.

______________________________________________________________________________________________________________________________________________________________________________________________________________________________________________________________________
